# Supplementary material
Source: HighWire-hosted journal article supplement (https://care.diabetesjournals.org/content/suppl/2019/05/10/dc18-2319)
Supplement: DC182319SupplementaryData.pdf [file DC182319SupplementaryData.pdf]

SUPPLEMENTARY DATA

**Supplementary 1.** Schematic diagram of the crossover study protocol.

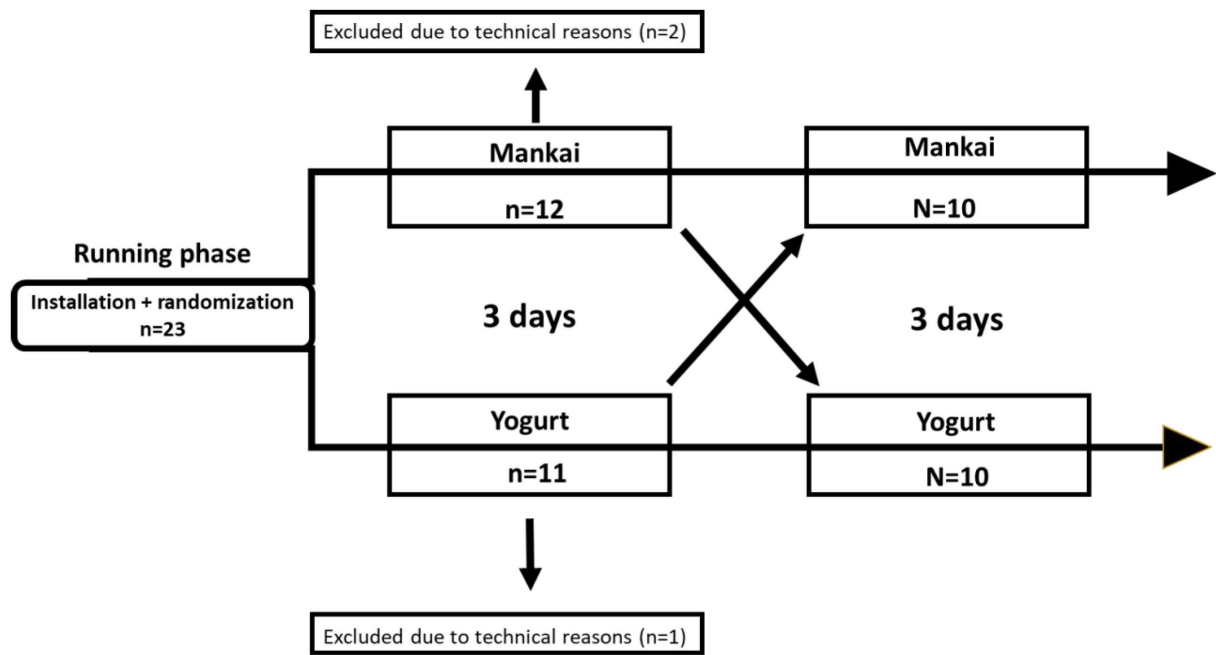

## SUPPLEMENTARY DATA

**Supplementary 2.** The sensor is factory-calibrated, and does not require further calibration during the 14-day wearing period. The data is transferred to a reader when brought into proximity of the sensor. The reader then display the current glucose level, a glucose trend arrow, and glucose readings over the previous 8 hours. Glucose data are automatically captured each minute and stored.

SUPPLEMENTARY DATA

**Supplementary 3.** Baseline characteristics of the study population across groups in the continuous glucose crossover trial after initial randomization (n=23)

|                                           | Group 1 order*,<br>(n=11) | Group 2 order†<br>(n=12) | Entire n=23 | <i>p</i> between<br>groups |
|-------------------------------------------|---------------------------|--------------------------|-------------|----------------------------|
| Age, years                                | 50.9±8.8                  | 50.9±12.2                | 50.9±10.5   | 0.83                       |
| Weight, kg                                | 91.6±13.5                 | 91.6±15.9                | 91.6±14.5   | 0.49                       |
| Waist circumference, cm                   | 109.1±8.8                 | 108.1±9.7                | 108.6±9.1   | 0.83                       |
| Fasting plasma glucose, mg/dL             | 112.1±20.2                | 110.7±17.0               | 111.4±18.3  | 0.90                       |
| HbA1c                                     |                           |                          |             |                            |
| %                                         | 5.7±0.8                   | 5.4±0.5                  | 5.5±0.7     | 0.21                       |
| mmol/mol                                  | 39.1±8.5                  | 35.2±6.0                 | 37.0±7.4    | 0.21                       |
| Insulin, µIU/ml                           | 15.8±9.3                  | 15.9±8.6                 | 15.8±8.8    | 0.93                       |
| Systolic Blood pressure, mm Hg            | 129.1±12.6                | 136.3±15.9               | 132.8±14.5  | 0.12                       |
| Diastolic Blood pressure, mm Hg           | 82.4±13.2                 | 80.8±11.6                | 81.5±12.1   | 0.83                       |
| Triglyceride, mg/dL                       | 130.1±36.2                | 143.4±77.8               | 137.1±60.6  | 0.98                       |
| HDL, mg/dL                                | 44.4±8.5                  | 46.6±16.7                | 45.6±13.2   | 0.98                       |
| Alanine aminotransferase (ALT),<br>unit/L | 34.5±14.7                 | 33.3±17.7                | 33.9±16.0   | 0.74                       |
| Aspartate transaminase (AST),<br>units/L  | 26.4±8.3                  | 23.8±7.7                 | 25.1±7.9    | 0.83                       |

Values are presented as mean±standard deviation for continuous variables. *p* value according to an Mann-Whitney test for continuous variables

\*, group 1 started with yogurt shake; †, group 2 started with Mankai shake.

SUPPLEMENTARY DATA

**Supplementary 4.** Glycemic profile after *Wolffia Globosa* (Mankai) and yogurt intake

|                                         | <i>Wolffia Globosa</i><br>(Mankai) | Yogurt        | <i>p</i> -value |
|-----------------------------------------|------------------------------------|---------------|-----------------|
| Glucose peak, Δ from<br>baseline, mg/dL | 13.4±9.2                           | 19.3±15.1     | 0.044           |
| Next morning fasting<br>glucose, mg/dL  | 83.2±0.8                           | 86.6±13.0     | 0.041           |
| Time to peak, min                       | 77.5±29.2                          | 59.2±28.4     | 0.037           |
| NetAUC (0-60min),<br>mg/dL*min          | 185.1±340.1                        | 441.4±336.5   | 0.005           |
| NetAUC (0-180min),<br>mg/dL*min         | 707.9±1428.5                       | 1576.6±1810.1 | 0.037           |

SUPPLEMENTARY DATA

**Supplementary 5.** Glucose trajectory overnight and glycemic profile after *Wolffia globosa* (Mankai) or yogurt intake with inclusion of all observations.

\* $p < 0.05$  differences between groups, \*\* $p < 0.01$  differences between groups.

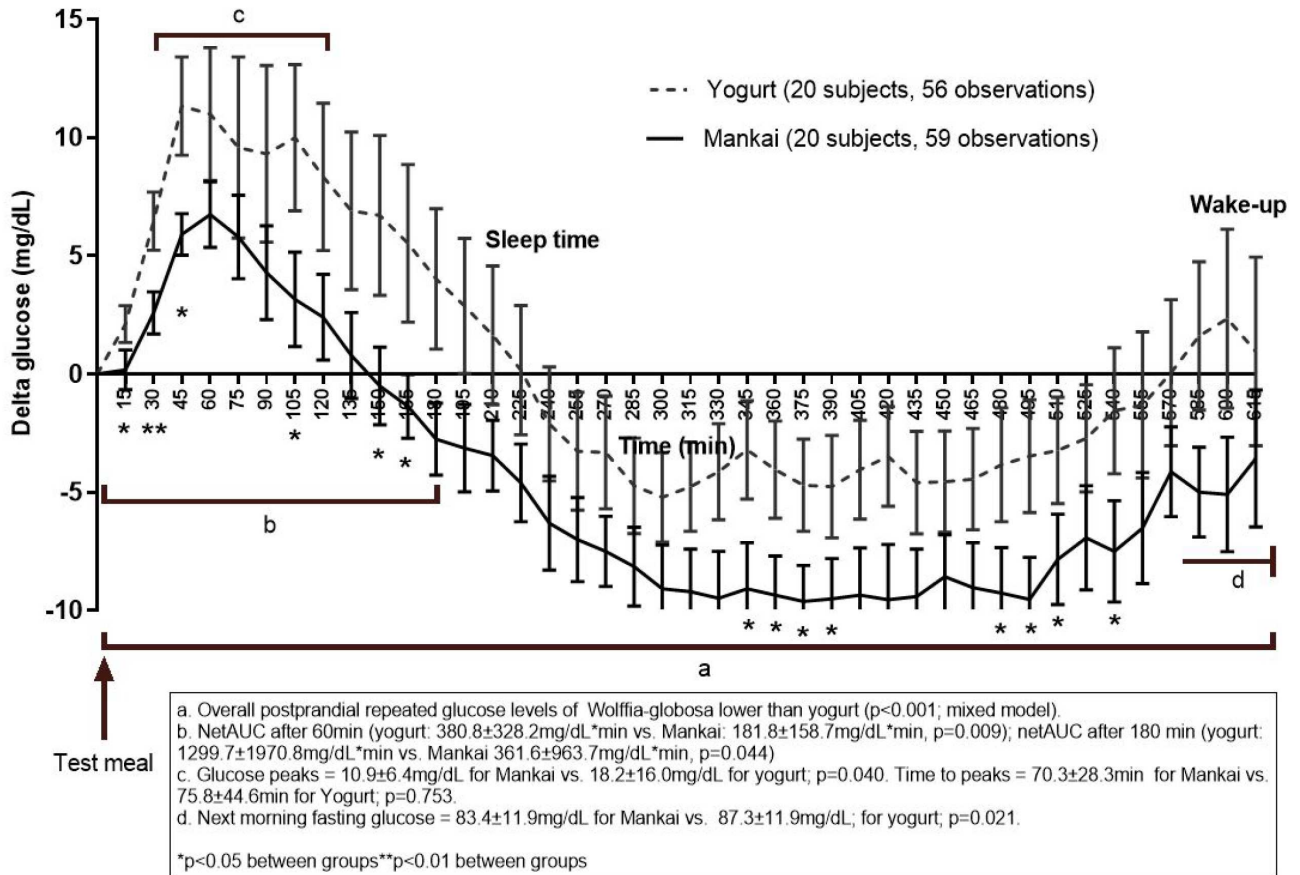

Glycemic profile after *Wolffia Globosa* (Mankai) and yogurt intake including all observations

|                                             | <i>Wolffia Globosa</i><br>(Mankai) | Yogurt              | p-value |
|---------------------------------------------|------------------------------------|---------------------|---------|
| Glucose peak, $\Delta$ from baseline, mg/dL | 10.9 $\pm$ 6.4                     | 18.2 $\pm$ 16       | 0.04    |
| Next morning fasting glucose, mg/dL         | 83.4 $\pm$ 11.9                    | 87.3 $\pm$ 11.9     | 0.021   |
| Time to peak, min                           | 70.3 $\pm$ 28.3                    | 75.8 $\pm$ 44.6     | 0.753   |
| NetAUC (0-60min), mg/dL*min                 | 181.2 $\pm$ 158.7                  | 380.8 $\pm$ 328.2   | 0.009   |
| NetAUC (0-180min), mg/dL*min                | 361.6 $\pm$ 963.7                  | 1299.7 $\pm$ 1970.8 | 0.044   |

SUPPLEMENTARY DATA

**Supplementary 6.** Changes in insulin and glucose blood levels at 30, 90 and 180min after administration of the test meal, as part of the bioavailability test(1)

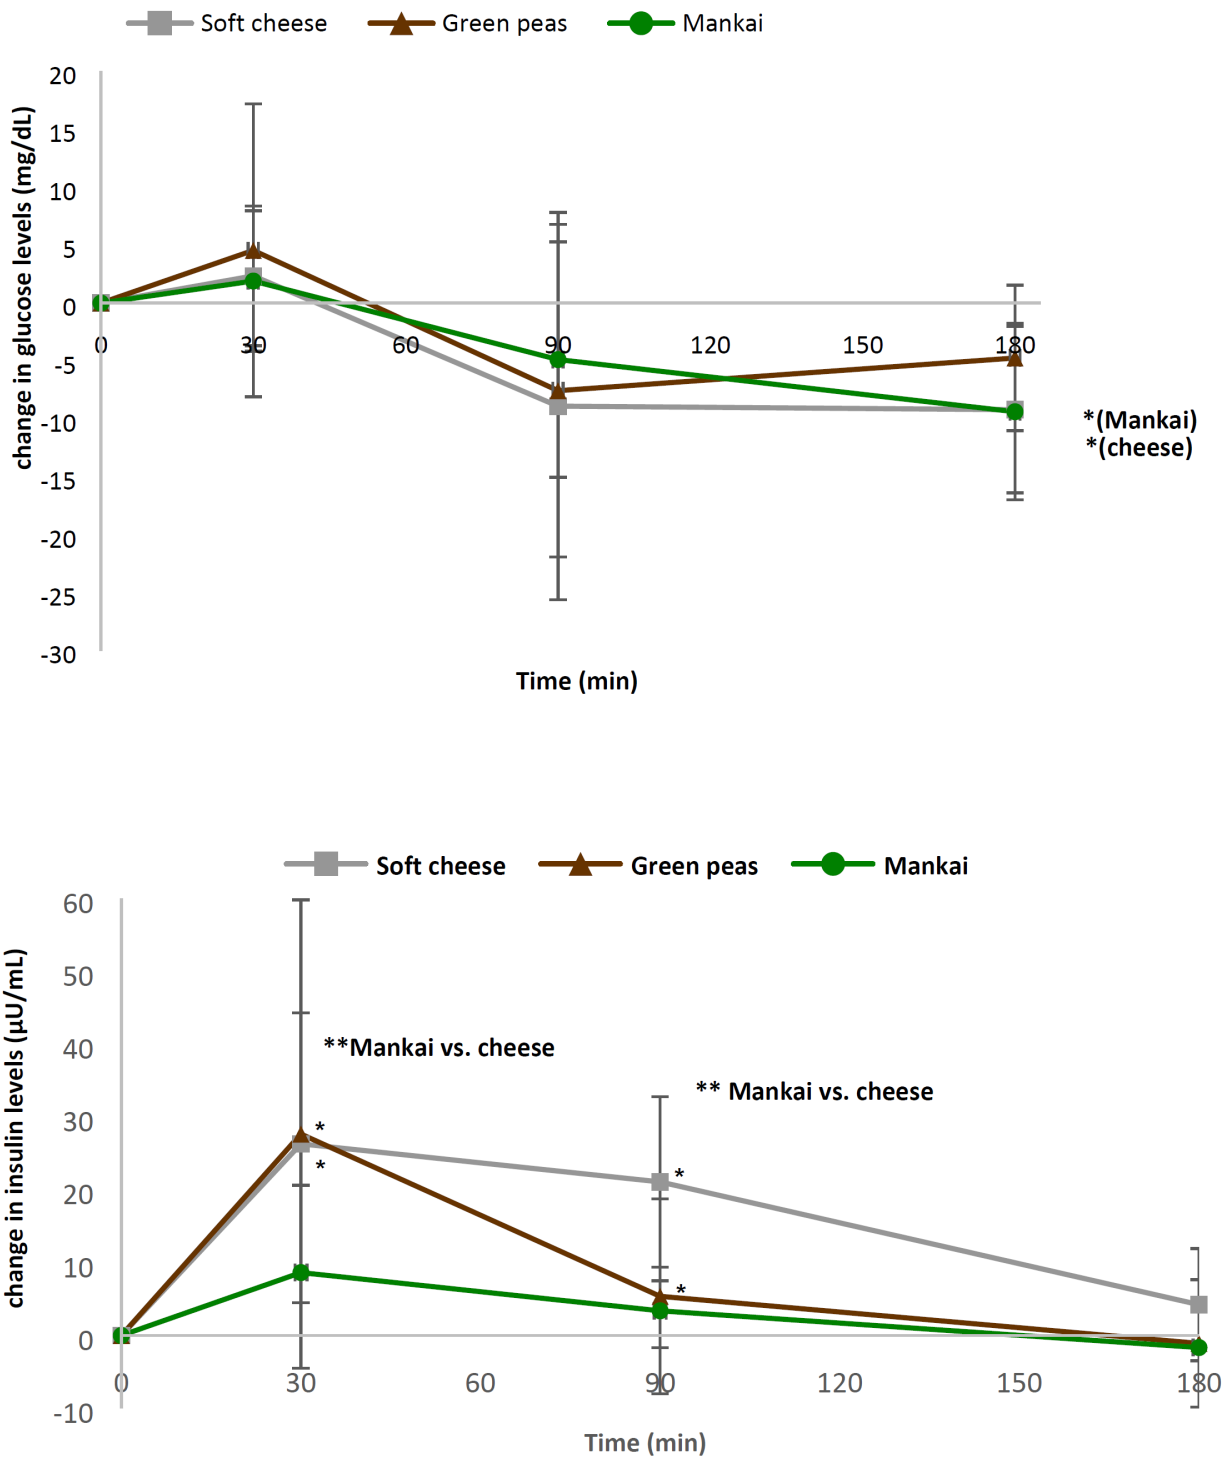

Vertical bars indicate ±1 SD; \* indicates p<0.05 vs. baseline; \*\* indicates p<0.05 for difference between

## SUPPLEMENTARY DATA

the intervention groups. Values were analyzed as repeated measurements by using the Friedman test. Differences between groups were analyzed by using the Kruskal-Wallis test, in case of significance, by using the Mann-Whitney test.

1. Kaplan A, Zelicha H, Tsaban G, Yaskolka Meir A, Rinott E, Kovsky J, et al. Protein bioavailability of *Wolffia globosa* duckweed, a novel aquatic plant, – a randomized controlled trial. *Clin Nutr*; 2018;pii S0261-5614(18)32577-9.
